# Supplementary material for: Endovascular Treatment of Congenital Portosystemic Shunt: A Single-Center Prospective Study
Source: PubMed Central journal article supplement — Pediatr Gastroenterol Hepatol Nutr. 2022 Mar 10;25(2):147–62. doi: 10.5223/pghn.2022.25.2.147 (PMC8958053; doi:10.5223/pghn.2022.25.2.147), 2022-03-10
Supplement: pghn-25-147-s001.pdf [file pghn-25-147-s001.pdf]

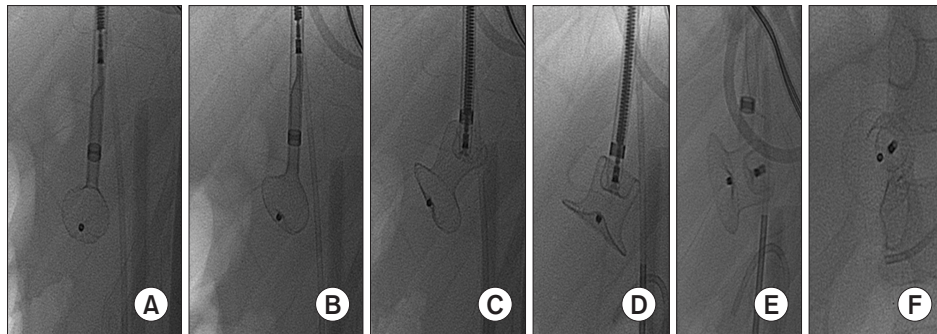

**Supplementary Fig. 1.** Delivery of an Amplatzer™ Ductu-Occluder in a latero-lateral portocaval shunt present in Case 2. (A-D) show the progressive placement of the plug and figures. (E, F) show the plug already delivered.
